# Supplementary material for: A Split-Marker System for CRISPR-Cas9 Genome Editing in Methylotrophic Yeasts
Source: MDPI journal article supplement (doi:10.3390/ijms24098173), 2023-05-03
Supplement: s1 [file s1]

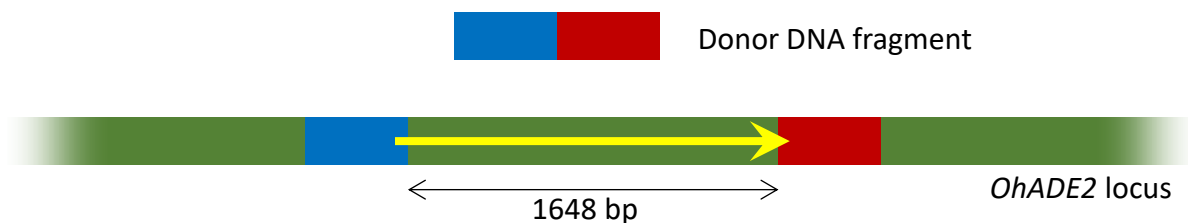

GATGTCGGAAAGTCAACAAATCCAGGAGATCTTCAACGAGAAGAACGACTGCGACTTCTCTACGCTGCCGACGCCTCTGACGTGCACTCAATCGCTACTCTCTTCAAGAGATATCTGCGAACTCTGAAGGAGACGGTGATCCC  
 AGAGGAAGAGGCCAAGGAACTCATGTCGCTCACGCTGGCAGCAGATCACGAGGCGTCCGTGCCAAAGGTGAAGGAAACGCTGCAGAACTGCCAACTTTGAACCTCGACGTTCTCTATGTGCTCTTCAGATACTTCCAGCAGGT  
 GCTCAAAACACAAAGATCTCAACAAGATGAGTATTGGCGCGCTGAGCGTGTGATGGCTCCCAACCTCACTCCTTTCGATGGTGCCAAGGAGATTGCTCGGAGCTGCTCATAATTACAAGTACTACTTTGAGGACGGCGAGAT  
 AGTGGCGCGTAGTGCTCCAGGCTTGCCATTACGTAATCGGAACAATTTTCATAGATAATAATATCCAAGTCAAAAAAATACATTAAATTAATTAGTATCATGGACTCGAAGGCTGTAGGGGCTCTGTTGGCTACGAGGAGTA  
 TCTTAGAAAAATAGATAGGATCGACTTAATCAATCATCAGCATTTTATTCTGCGAAAAATATAAAATATTTAATTTTTTCATGTTGCGCAGTCAGGTCCGATATATTTCCAGATCTCTACGTTGCACGCCATCAAAGTGCCCGA  
 TAACGCGCCTACACTCGAGGAAATGCTGCTTGGCTCAGAAAATTAGGCAGGSCCTCGGGACACTAAAATCCGAGGCCCATAGAATTGCTAAGTCAACTTACGAGATACGACAAGCTTCGGAGCTCGAGTCCGAAAAAAA  
 CCCAGAATACATTAACTAAGGCTTCTTGGGGGCAACACGTCAAGGTGGTGAAGGAGCAGACCCACATAGCGAACCCAGGAACCTCGTTTTTCACGCTCTCTGTGCCCGCGTCCGACTACTTCTGTGGCGTCTGCGCGTTCTC  
 GAGACTGCCATCCAACAAACGTCCCAAGGCCTACTCTTCGAGGCCCTTTTCAGACTTGAAAGTCGTTAAGGTGAGGTGCGGAAAGGGTGGAATGGAG

**Figure S7.** Scheme and 5'-3' sequence of the PCR product used as a donor DNA for obtaining deletion of the *ADE2* gene in *Ogataea hagerorum*. Left and right recombination arms of the donor DNA and homologous sequences in the host genome are shown in blue and red, respectively. The sequences of the *OhADE2* locus unrelated to the recombination arms are shown in green on the scheme. The yellow arrow indicates position of the *OhADE2* ORF.
